# Supplementary material for: An update on the 4D-LETKF data assimilation system for the wholeneutral atmosphere
Source: Copernicus journal article supplement (doi:10.5194/gmd-2020-381), 2021-03-16
Supplement: Supplementary file 1 [file gmd-2020-381-supplement.zip]

## Supplement

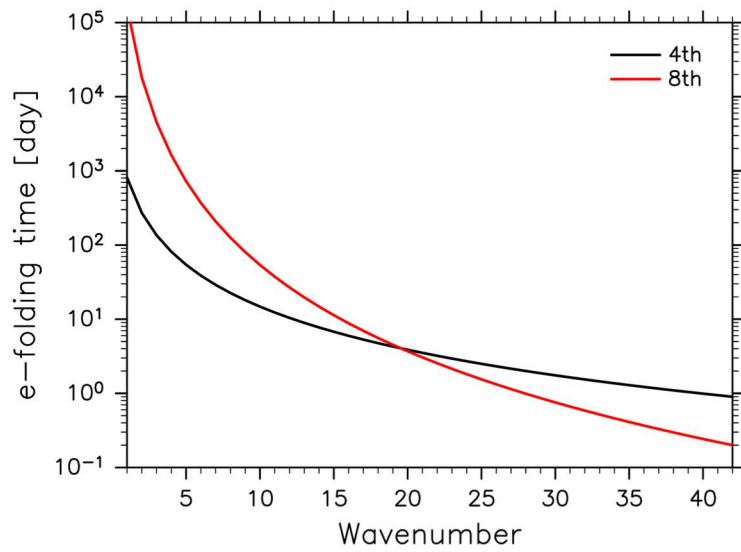

S1: The e-folding time of the horizontal diffusion as a function of the wavenumber for the diffusion of the fourth-order (black curve) and eighth-order (red curve) diffusion. Note that a smaller value on the vertical axis means stronger horizontal diffusion. While the diffusion around the wavenumber of 20 is not changed, the diffusion for the larger-scale waves including tides weakens for the eighth-order setting.
